# Supplementary material
Source: PubMed Central journal article supplement (PMC6439953)
Supplement: jamaneurol-76-194-s001.pdf [file jamaneurol-76-194-s001.pdf]

## Supplementary Online Content

Boers AMM, Jansen IGH, Brown S, et al. Mediation of the relationship between endovascular therapy and functional outcome by follow-up infarct volume in patients with acute ischemic stroke. *JAMA Neurol*. Published online January 7, 2019. doi:10.1001/jamaneurol.2018.3661

**eTable 1.** Four-step approach for testing mediation

**eTable 2.** Associations of predictors with 90-day modified Rankin Scale score in multivariable modeling

**eTable 3.** Mediating effect of FIV on the association between treatment and ordinal 90-day mRS in subgroup of patients with imaging obtained after 48 hours after onset only

**eTable 4.** Mediating effect of FIV on the association between treatment and ordinal 90-day mRS in subgroup of patients with MRI modality only

**eFigure 1.** Relation between adjusted FIV and estimated probability of functional independence between EVT, control, and reperfusion patients

**eFigure 2.** Relation between adjusted FIV and estimated probability of functional independence between EVT, control, and nonreperfusion patients

This supplementary material has been provided by the authors to give readers additional information about their work.

**eTable 1.** Four-step approach for testing mediation

| Step   | Analysis                                                                                         | Visual representation                                                               |
|--------|--------------------------------------------------------------------------------------------------|-------------------------------------------------------------------------------------|
| Step 1 | Regression analysis with X predicting Y to test for path c, $Y = B_0 + B_1X + e$                 | 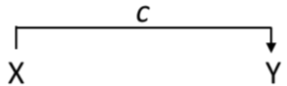 |
| Step 2 | Regression analysis with X predicting M to test for path a, $M = B_0 + B_1X + e$                 |  |
| Step 3 | Regression analysis with M predicting Y to test the significance of path b, $Y = B_0 + B_1M + e$ |  |
| Step 4 | Multiple regression analysis with X and M predicting Y, $Y = B_0 + B_1X + B_2M + e$              |  |

**eTable 2.** Associations of predictors with 90-day modified Rankin Scale score in multivariable modeling

| <b>Predictor</b>                     | <b>Odds Ratio</b> | <b>Lower 95% confidence limit</b> | <b>Upper 95% confidence limit</b> | <b>p-value</b> |
|--------------------------------------|-------------------|-----------------------------------|-----------------------------------|----------------|
| Follow-up infarct volume (per 10 ml) | 0.92              | 0.90                              | 0.94                              | <.001          |
| Endovascular therapy                 | 2.21              | 1.52                              | 3.21                              | <.001          |
| Age (per 10 years)                   | 0.62              | 0.57                              | 0.67                              | <.001          |
| NIHSS at baseline (per 5 points)     | 0.82              | 0.74                              | 0.90                              | 0.001          |
| Hemorrhage: HI-1                     | 0.96              | 0.73                              | 1.27                              | 0.79           |
| Hemorrhage: HI-2                     | 0.73              | 0.54                              | 0.99                              | 0.043          |
| Hemorrhage: PH-1                     | 0.92              | 0.63                              | 1.33                              | 0.64           |
| Hemorrhage: PH-2                     | 0.82              | 0.54                              | 1.25                              | 0.36           |
| Hemorrhage: remote PH                | 1.41              | 0.65                              | 3.03                              | 0.38           |
| Hemorrhage: Intraventricular         | 0.29              | 0.13                              | 0.64                              | 0.002          |
| Hemorrhage: Subarachnoid             | 0.73              | 0.34                              | 1.56                              | 0.42           |
| Hemorrhage: Subdural                 | 0.17              | 0.01                              | 3.28                              | 0.24           |
| Symptom side left (vs right)         | 0.91              | 0.75                              | 1.11                              | 0.36           |
| ASPECTS Caudate involvement          | 1.09              | 0.85                              | 1.40                              | 0.49           |
| ASPECTS Lentiform involvement        | 0.81              | 0.60                              | 1.11                              | 0.20           |
| ASPECTS Internal Capsule involvement | 0.45              | 0.35                              | 0.58                              | <.001          |
| ASPECTS Insula involvement           | 0.78              | 0.60                              | 1.01                              | 0.057          |
| ASPECTS M1 involvement               | 0.93              | 0.72                              | 1.20                              | 0.57           |
| ASPECTS M2 involvement               | 0.82              | 0.64                              | 1.06                              | 0.13           |
| ASPECTS M3 involvement               | 0.98              | 0.74                              | 1.29                              | 0.88           |
| ASPECTS M4 involvement               | 0.82              | 0.63                              | 1.08                              | 0.15           |
| ASPECTS M5 involvement               | 0.77              | 0.60                              | 0.99                              | 0.042          |
| ASPECTS M6 involvement               | 0.77              | 0.58                              | 1.02                              | 0.066          |

Abbreviations: NIHSS, National Institutes of Health Stroke Scale score; HI, Hemorrhagic infarct; PH, parenchymal hematoma; ASPECTS, Alberta Stroke Program Early CT score

**eTable 3.** Mediating effect of FIV on the association between treatment and ordinal 90-day mRS in subgroup of patients with imaging obtained after 48 hours after onset only

| Pathway   | Unadjusted     |       |               |         | Adjusted       |       |               |         |
|-----------|----------------|-------|---------------|---------|----------------|-------|---------------|---------|
|           | Effect measure | Value | 95% CI        | p-value | Effect measure | Value | 95% CI        | p-value |
| <i>a</i>  | $\beta$        | -0.27 | -0.46 – -0.09 | 0.004   | $\beta$        | -0.13 | -0.23 – -0.04 | 0.007   |
| <i>b</i>  | cOR            | 0.43  | 0.38 – 0.49   | <0.001  | acOR           | 0.47  | 0.37 – 0.58   | <0.001  |
| <i>c</i>  | cOR            | 1.75  | 1.33 – 2.29   | <0.001  | acOR           | 1.81  | 1.36 – 2.39   | <0.001  |
| <i>c'</i> | cOR            | 1.54  | 1.17 – 2.02   | 0.002   | acOR           | 1.74  | 1.31 – 2.31   | <0.001  |

FIV transformed by  $\ln(\text{FIV}+1)$ . Path *a* represents the regression coefficient of the association between treatment (control or endovascular therapy) and FIV; *b* between FIV and 90-day mRS; *c* between treatment and 90-day mRS; and *c'* between treatment and 90-day mRS, controlling for FIV. Multivariable regression analysis included FIV, location, Hemorrhage type, age, and National Institutes of Health and Stroke Scale score.

Abbreviations: FIV, follow-up infarct volume; mRS, modified Rankin Scale; (a)cOR, (adjusted) common odds ratio; CI, confidence interval

**eTable 4.** Mediating effect of FIV on the association between treatment and ordinal 90-day mRS in subgroup of patients with MRI modality only

| Pathway   | Unadjusted     |       |              |         | Adjusted       |       |              |         |
|-----------|----------------|-------|--------------|---------|----------------|-------|--------------|---------|
|           | Effect measure | Value | 95% CI       | p-value | Effect measure | Value | 95% CI       | p-value |
| <i>a</i>  | $\beta$        | -0.17 | -0.48 – 0.15 | 0.30    | $\beta$        | -0.05 | -0.21 – 0.10 | 0.52    |
| <i>b</i>  | cOR            | 0.40  | 0.33 – 0.49  | <0.001  | acOR           | 0.45  | 0.31 – 0.64  | <0.001  |
| <i>c</i>  | cOR            | 1.70  | 1.11 – 2.60  | 0.015   | acOR           | 2.07  | 1.29 – 3.31  | 0.003   |
| <i>c'</i> | cOR            | 1.61  | 1.04 – 2.48  | 0.032   | acOR           | 2.08  | 1.30 – 3.34  | 0.003   |

FIV transformed by  $\ln(\text{FIV}+1)$ . Path *a* represents the regression coefficient of the association between treatment (control or endovascular therapy) and FIV; *b* between FIV and 90-day mRS; *c* between treatment and 90-day mRS; and *c'* between treatment and 90-day mRS, controlling for FIV. Multivariable regression analysis included FIV, location, Hemorrhage type, age, and National Institutes of Health and Stroke Scale score.

Abbreviations: FIV, follow-up infarct volume; mRS, modified Rankin Scale; (a)cOR, (adjusted) common odds ratio; CI, confidence interval

**eFigure 1.** Relation between adjusted FIV and estimated probability of functional independence between EVT, control, and reperfusion patients

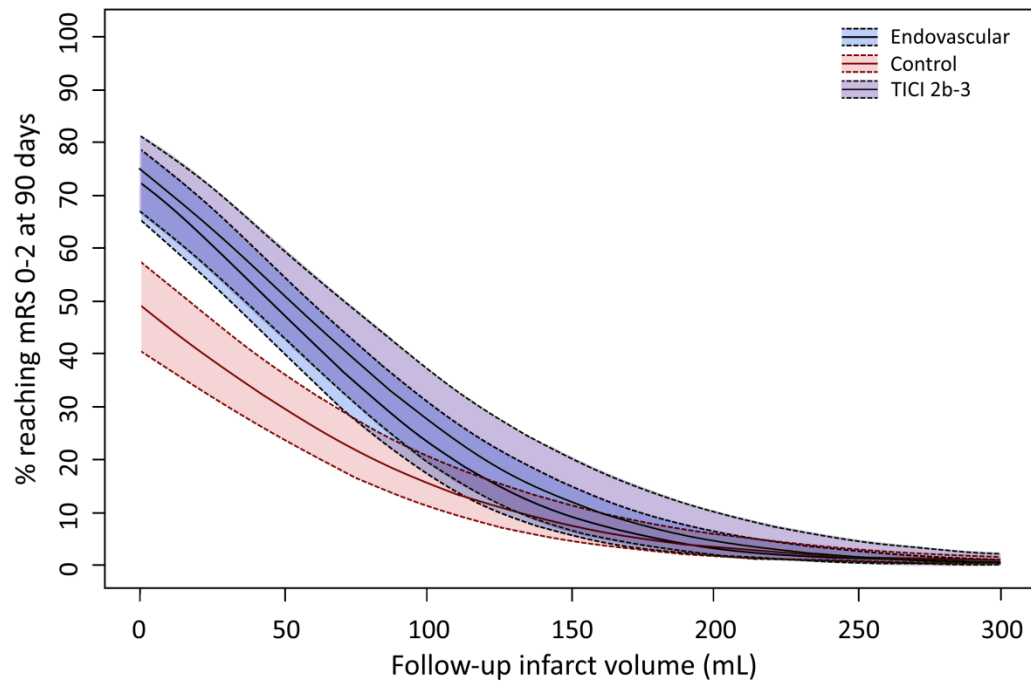

Relation between adjusted FIV and estimated probability of functional independence (point estimates  $\pm$  95% CI), shown for patients allocated to EVT and control and who achieved substantial reperfusion (TICl 2b-3)

**eFigure 2.** Relation between adjusted FIV and estimated probability of functional independence between EVT, control, and nonreperfusion patients

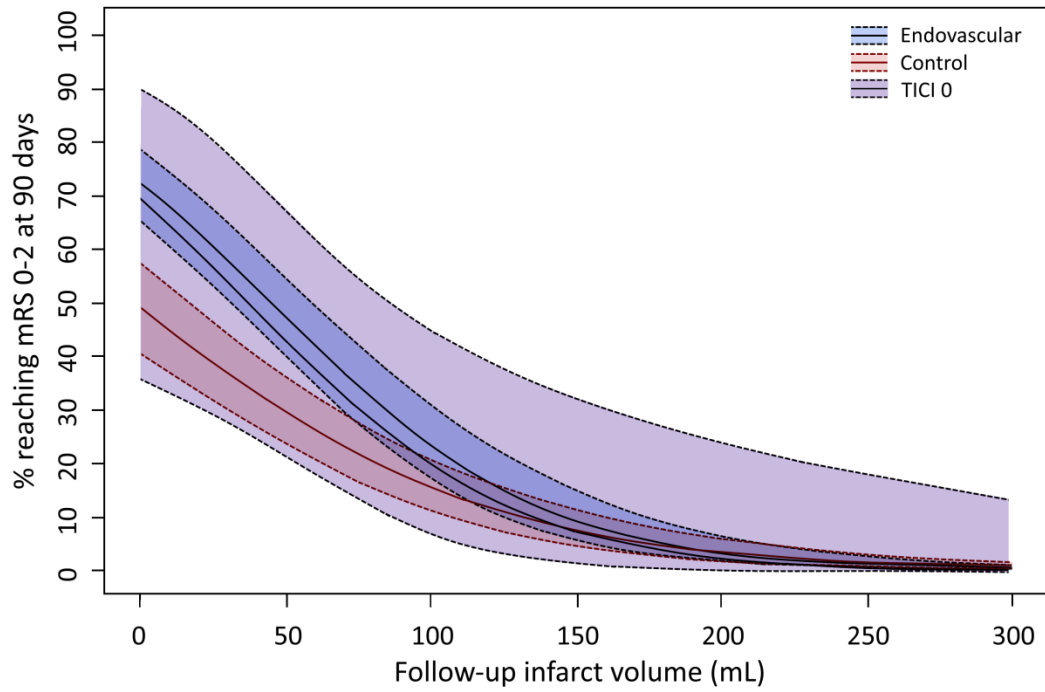

Relation between adjusted FIV and estimated probability of functional independence (point estimates  $\pm$  95% CI), shown for patients allocated to EVT and control and who did not achieve reperfusion (TICI 0)
